# Supplementary material for: New ultrafast scintillators with core valence luminescence: Cs2MgCl4 and Cs3MgCl5
Source: Royal Society of Chemistry journal article supplement (doi:10.1039/d4tc00877d), 2024-01-01
Supplement: d4tc00877d1.pdf [file d4tc00877d1.pdf]

## Electronic Supplementary Information

### **New Ultrafast Scintillators with Core Valence Luminescence: $\text{Cs}_2\text{MgCl}_4$ and $\text{Cs}_3\text{MgCl}_5$**

Daniel Rutstrom,<sup>\*ab</sup> Luis Stand,<sup>ac</sup> Dylan Windsor,<sup>b</sup> Haixuan Xu,<sup>b</sup> Maciej Kapusta,<sup>d</sup> Charles L. Melcher,<sup>ac</sup>  
Mariya Zhuravleva<sup>ab</sup>

<sup>a</sup> Scintillation Materials Research Center, University of Tennessee, Knoxville, TN 37996, USA.

<sup>b</sup> Department of Materials Science and Engineering, University of Tennessee Knoxville, Knoxville, Tennessee, USA.

<sup>c</sup> Department of Nuclear Engineering, University of Tennessee Knoxville, Knoxville, Tennessee, USA.

<sup>d</sup> Siemens Medical Solutions, Rockford, Tennessee, USA

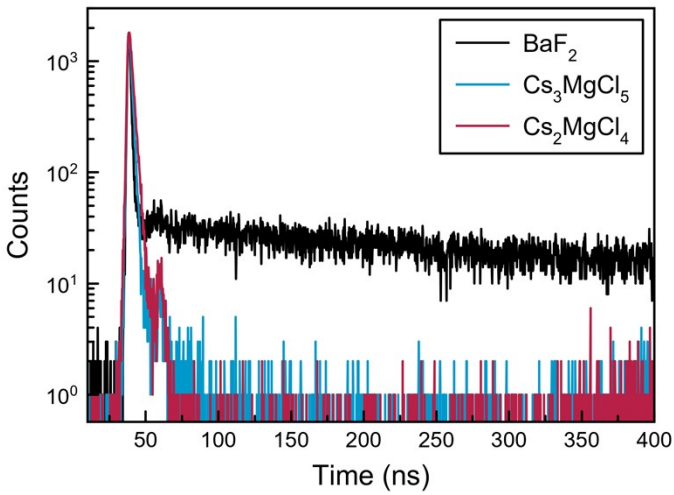

**Figure S1.** Scintillation decay time profiles measured over a longer time window.

Crystal coupled to PMT with thin layer of mineral oil, Teflon stretched overtop

$\sim 5 \times 4 \times 2$  mm<sup>3</sup>  $Cs_2MgCl_4$  crystal after 18 hours measured in air

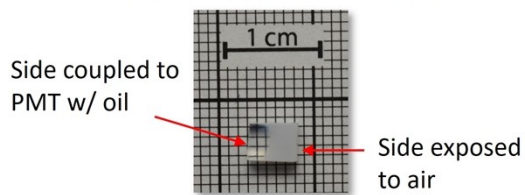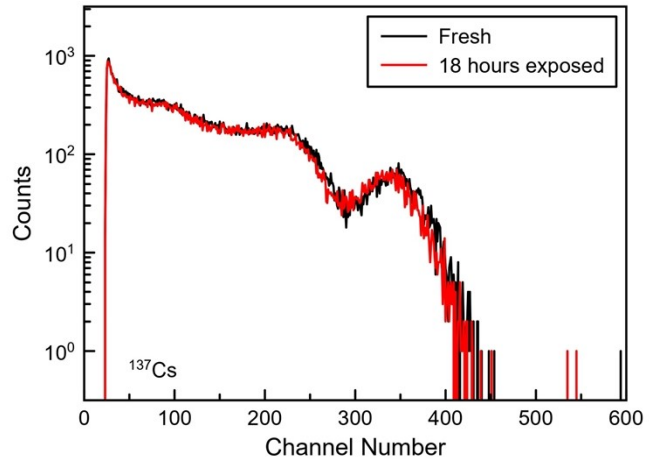

**Figure S2.** (left) Photograph of a  $Cs_2MgCl_4$  sample used to test stability of light yield measurements in air. (right) Resulting pulse height spectra measured with the fresh sample versus after 18 hours of exposure.
